# Supplementary material for: The influence of activation atmosphere on the active phase and hydrotreating activity of LDH-based NiW pre-sulfurized catalysts
Source: Royal Society of Chemistry journal article supplement (doi:10.1039/d2re00540a), 2023-01-01
Supplement: d2re00540a1.pdf [file d2re00540a1.pdf]

## The influence of activation atmosphere on the active phase and hydrotreating activity of LDHs-based NiW pre-sulfurized catalysts

Hao Wang<sup>a\*</sup>, Hongchuan Xiong<sup>a</sup>, Fan Yang<sup>a</sup>, Yang Li<sup>b</sup>, Shiang He<sup>a</sup>, Yan Wu<sup>a</sup>

<sup>a</sup>-School of Chemistry and Chemical Engineering, Southwest Petroleum University, Chengdu

610500, China

<sup>b</sup>-Petrochemical Research Institute, PetroChina Co. Ltd, Beijing 102206, China

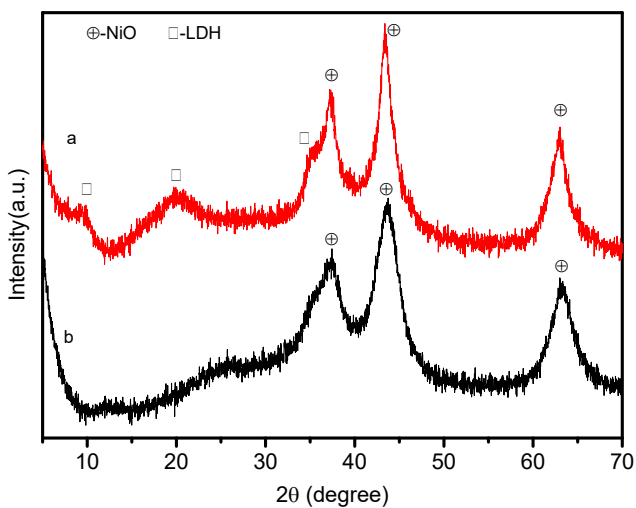

**Fig. S1** XRD patterns of nitrate NiAl LDH calcinated under  $N_2$  (a) and  $H_2$  (b) at 300 °C
